# Supplementary material
Source: publisher figshare collection journal article supplement (https://sage.figshare.com/ndownloader/files/14145005)
Supplement: Supplementary file 1 [file 14145005]

## Appendix B: Completed Team Project Rubric

Grade: 20 – 17 (A), 16-13 (B), 12-9 (C), 8-5 (D), 4-0 (F)

TEAM: \_\_\_\_\_

|                                                                         | Exceeds Expectations (5,4)                                                                                                                               | Meets Expectations (3,2)                                                                                                   | Does Not Meet Expectations (1,0)                                                                                                          | Score |
|-------------------------------------------------------------------------|----------------------------------------------------------------------------------------------------------------------------------------------------------|----------------------------------------------------------------------------------------------------------------------------|-------------------------------------------------------------------------------------------------------------------------------------------|-------|
| Create Tables with appropriate relationship type. Populate with Records | More than two tables and tables are populated with appropriate data types and records. More than 1 relationship.                                         | Two tables and tables are populated with appropriate data types and records. At least one 1:M relationship between tables. | Tables under populated with records or have incorrect data types. No relationship between tables or incorrect relationship between tables |       |
| Create Forms                                                            | More than two forms. Able to use for adding, editing, and deleting records. Includes navigation buttons                                                  | At least two forms. Able to use for adding, editing, and deleting records.                                                 | Less than two forms. Forms inadequate for adding, editing, and deleting records                                                           |       |
| Create Queries                                                          | Many queries. Queries answer required questions and provides additional information not specified in assignment                                          | Queries answer required questions only. Does not provide additional information other than what is specified in assignment | Queries do not answer required questions.                                                                                                 |       |
| Create Reports                                                          | Many reports. Reports are easy to read and provide useful information. Reports have been customized to include pictures, calculated fields, custom names | At least two reports. Reports are easy to read and provide useful information.                                             | Less than two reports. Reports do not provide required information.                                                                       |       |
| Total Score                                                             |                                                                                                                                                          |                                                                                                                            |                                                                                                                                           |       |
